# Supplementary material for: The ShGlomAssay Combines High-Throughput Drug Screening With Downstream Analyses and Reveals the Protective Role of Vitamin D3 and Calcipotriol on Podocytes
Source: PubMed Central journal article supplement (PMC9150175; doi:10.3389/fcell.2022.838086), 2022-05-16
Supplement: Table1.pdf [file Table1.pdf]

**Supplementary Table 1. Compilation of the 15 most up-regulated and down-regulated genes with kidney disease-relevant publications and their expression in patients with FSGS, DN and MCD. Direc; Direction of gene regulation, Red; up-regulation, green; down-regulation, gray; no data.**

|          | Direc | References                            | Results                                                                        | LD_DN           |             | LD_MCD          |             | LD_FSGS         |             |
|----------|-------|---------------------------------------|--------------------------------------------------------------------------------|-----------------|-------------|-----------------|-------------|-----------------|-------------|
|          |       |                                       |                                                                                | Log Fold Change | q-value (%) | Log Fold Change | q-value (%) | Log Fold Change | q-value (%) |
| Mmp8     | ↑     | DOI: 10.1677/JOE-08-0241              | Vit D treatment increases Mmp8                                                 |                 |             |                 |             |                 |             |
|          |       | DOI: 10.1053/j.gastro.2003.12.045     | Mmp8 treatment reduces liver cirrhosis                                         |                 |             |                 |             |                 |             |
|          |       | DOI: 10.3109/0886022X.2014.996842     | Mmp8 null mice has more severe kidney damage than Mmp8 wild-type               |                 |             |                 |             |                 |             |
| Nphs1    | ↑     | DOI: 10.1038/sj.ki.5001625            | Up-regulation of nephrin promoter activity and mRNA by vit D                   |                 |             |                 |             |                 |             |
|          |       | DOI: 10.1093/ndj/gfp243               | Up-regulation of nephrin promoter activity and mRNA by vit D                   |                 |             |                 |             |                 |             |
|          |       | DOI: 10.1074/jbc.M111.269118          | Up-regulation of nephrin promoter activity and mRNA by vit D                   | -0.96           | 0.00        | 0.07            | NaN         | -0.08           | 12.70       |
|          |       | PMCID: PMC7447091                     | Higher Nphs1 expression and reduced kidney injury after calcitriol treatment   |                 |             |                 |             |                 |             |
| Lrtm2    | ↑     |                                       |                                                                                |                 |             |                 |             |                 |             |
| Mtm6     | ↑     |                                       |                                                                                | 0.68            | 0.00        | 0.07            | 49.43       | 0.70            | 0.00        |
| Kirrel2  | ↑     | DOI: 10.1042/CS20130258               | Down-regulation of Kirrel2 in glomerular kidney diseases                       |                 |             |                 |             |                 |             |
|          |       | DOI: 10.1093/ndj/gfr576               | Kirrel2 is regulated by NF-κB and NF-κB is regulated by vit D                  |                 |             |                 |             |                 |             |
|          |       | DOI: 10.1016/j.ephph.2018.04.032      | Kirrel2 is regulated by NF-κB and NF-κB is regulated by vit D                  |                 |             |                 |             |                 |             |
| Cdkn1c   | ↑     | DOI: 10.1159/000101793                | Role of Cdkn1c in podocyte damage                                              | -0.10           | 4.01        | -0.15           | 27.70       | -0.16           | 5.07        |
|          |       | DOI: 10.1158/1535-7163.MCT-07-2222    | Up-regulation of Cdkn1c by vit D analogue                                      |                 |             |                 |             |                 |             |
| Gdpd5    | ↑     | DOI: 10.1073/pnas.0805496105          | Inhibition of Gdpd5 increases osmo-protective glycerol phosphate               | 0.10            | 9.13        | -0.02           | NaN         | 0.08            | 9.68        |
| Pla2g7   | ↑     | DOI: 10.1016/j.amjms.2016.07.002      | Lp-PLA2 activity increases in patients with CKD                                |                 |             |                 |             |                 |             |
|          |       | DOI: 10.1007/s40620-018-0521-3        | PLA2 activity is increased in dialysis patients                                |                 |             |                 |             |                 |             |
| Plcb2    | ↑     | DOI: 10.1074/jbc.272.18.11902         | Plcb2 involved in vit D dependent calcium mobilization                         | 0.17            | 0.90        | 0.02            | 47.71       | -0.07           | 14.55       |
| Mdf1     | ↑     | DOI: 10.1016/j.gi.2017.04.009         | Vit D enhances the expression of Mdf1                                          |                 |             |                 |             |                 |             |
|          |       | DOI: 10.1152/ajprenal.00508.2019      | L-mfa increases fibronectin expression                                         | -0.04           | 25.31       | 0.02            | 47.71       | -0.10           | 6.14        |
|          |       | DOI: 10.1590/1414-431X20198333        | Col3a1 is significantly correlated with CKD                                    |                 |             |                 |             |                 |             |
| Col3a1   | ↑     | DOI: 10.1016/j.pupt.2019.01.003       | Reduction of pulmonary fibrosis through Col3a1 decrease by vit D               | 1.40            | 0.00        | 0.65            | 0.74        | 1.04            | 0.00        |
| Nfatc2ip | ↑     |                                       |                                                                                | 0.03            | 27.22       | -0.02           | NaN         | 0.14            | 0.09        |
| Hdac1    | ↑     | DOI: 10.1172/JCI124030                | Inhibition of Hdac1 leads to improvement of proteinuria and glomerulosclerosis |                 |             |                 |             |                 |             |
|          |       | DOI: 10.1016/j.jmb.2015.07.011        | Hdac1 leads to Vdr down-regulation                                             | 0.14            | 5.27        | 0.18            | 5.58        | 0.39            | 0.00        |
| Kcnk3    | ↑     | DOI: 10.1152/ajplung.00475.2019       | Vit D significantly increases Kcnk3 mRNA in human smooth muscle cell           | 0.25            | 0.07        | 0.07            | 20.95       | 0.08            | 2.51        |
| Hsd17b11 | ↑     |                                       |                                                                                | 0.16            | 4.62        | -0.03           | NaN         | 0.21            | 0.92        |
| Sgol2    | ↓     | DOI: 10.1681/ASN.2009040379           | Sgol2 is up-regulated after podocin inactivation in isolated mouse glomeruli   |                 |             |                 |             |                 |             |
|          |       | DOI: 10.1681/ASN.2010080860           | Sgol2 is up-regulated in Wt-1 mutant mice                                      |                 |             |                 |             |                 |             |
| Ccrf5    | ↓     | DOI: 10.1681/ASN.2008040432           | Ccrf5 is inflammation associated in dialysis patients                          |                 |             |                 |             |                 |             |
| Clec10a  | ↓     | DOI: 10.1038/ki.2011.217              | Clec10a as a marker for pro-inflammatory tissue macrophages in CKD             | 1.16            | 0.00        | 0.12            | 16.27       | 0.53            | 0.00        |
| Siglec1  | ↓     | DOI: 10.1093/ndj/gfaa121              | Siglec1 is up-regulated in tubular interstitium in diabetic nephropathy        |                 |             |                 |             |                 |             |
|          |       | DOI: 10.1016/j.berh.2019.06.004       | Siglec1 as a biomarker for Lupus nephritis                                     | 0.33            | 0.00        | 0.07            | 24.11       | 0.03            | NaN         |
| Gatm     | ↓     | DOI: 10.1681/ASN.2017.11.1179         | Gatm aggregates trigger inflammation in kidney failure                         | -0.85           | 0.00        | -0.50           | 0.31        | -0.58           | 0.00        |
| Cd38     | ↓     | DOI: 10.1111/j.1582-4934.2011.01462.x | Anti-epithelial-to-mesenchymal transition                                      | 0.56            | 0.00        | 0.32            | 0.00        | 0.23            | 0.04        |
| Il21r    | ↓     | DOI: 10.4049/jimmunol.1601687         | Il21r blockade ameliorates diabetic nephropathy                                | 0.17            | 0.30        | 0.08            | 18.05       | -0.19           | 0.02        |
| Penpe    | ↓     | DOI: 10.1038/natrev.2010.188          | Penpe is up-regulated under high glucose                                       | 0.23            | 1.63        | 0.16            | 25.64       | 0.10            | 3.04        |
| Pf4      | ↓     | DOI: 10.1177/1076029617729216         | Pf4 is up-regulated in dialysis patients with heart failure                    | -0.24           |             | 0.56            | 23.31       | 0.86            | 0.00        |
| Igf1     | ↓     | DOI: 10.15252/emmm.201404916          | Igf1 inhibition prevents mitochondria related kidney failure                   | -1.25           | 0.00        | -0.52           | 12.05       | -0.52           | 0.55        |
| Cd163    | ↓     | DOI: 10.1681/ASN.2019121285           | Cd163 as a lupus nephritis-urine biomarker                                     |                 |             |                 |             |                 |             |
|          |       | DOI: 10.1210/en.2014-1020             | Cd163 is upregulated in STZ-rats after vit D treatment                         | 1.79            | 0.00        | -0.41           | 43.94       | 0.98            | 0.30        |
| Stab1    | ↓     | DOI: 10.1038/nrendo.2010.18           | Stab1 as an alternatively activated macrophage marker                          | 0.78            | 0.00        | 0.12            | 14.89       | 0.45            | 0.00        |
| Mmp9     | ↓     | DOI: 10.1038/ki.2014.67               | Mmp9 is up-regulated in diabetic nephropathy                                   | 0.06            | 25.31       | -0.43           | 19.75       | -0.06           | 20.40       |
| Fcna     | ↓     | DOI: 10.1038/s41598-018-31887-4       | Fcna is up-regulated in monocyte macrophages                                   |                 |             |                 |             |                 |             |
| Ccl8     | ↓     | DOI: 10.1016/j.kint.2020.05.052       | Ccl8 is senescence associated                                                  | 1.20            | 0.00        | 0.25            | 1.30        | 0.56            | 0.00        |
